# Supplementary material for: Targeting BC200/miR218-5p Signaling Axis for Overcoming Temozolomide Resistance and Suppressing Glioma Stemness
Source: PubMed Central journal article supplement (PMC7463574; doi:10.3390/cells9081859), 2020-08-08
Supplement: cells-09-01859-s001.pdf [file cells-09-01859-s001.pdf]

## SUPPLEMENTARY INFORMATION

### Targeting BC200/miR218-5p signaling axis for overcoming temozolomide resistance and suppressing glioma stemness

Disclosed by Yu-Kai Su<sup>1,2,3,4†</sup>, Jia Wei Lin<sup>1,2,3,4†</sup>, Jing-Wen Shih<sup>5,6</sup>, Hao-Yu Chuang<sup>7</sup>, Iat-Hang Fong<sup>2,3,4</sup>, Chi-Tai Yeh<sup>1,8,9</sup>, Chien-Min Lin<sup>1,2,3,4,\*</sup>

#### Affiliation:

1. Graduate Institute of Clinical Medicine, College of Medicine, Taipei Medical University, Taipei City 11031, Taiwan
2. Department of Neurology, School of Medicine, College of Medicine, Taipei Medical University, Taipei City 11031, Taiwan
3. Division of Neurosurgery, Department of Surgery, Taipei Medical University-Shuang Ho Hospital, New Taipei City 23561, Taiwan
4. Taipei Neuroscience Institute, Taipei Medical University, Taipei 11031, Taiwan
5. Graduate Institute of Cancer Biology and Drug Discovery, College of Medical Science and Technology, Taipei Medical University, Taipei 11031, Taiwan.
6. Ph.D. Program for Cancer Biology and Drug Discovery, College of Medical Science and Technology, Taipei Medical University, Taipei 11031, Taiwan.
7. Department of Neurosurgery, An Nan Hospital, China Medical University, Tainan 70965, Taiwan
8. Department of Medical Research & Education, Taipei Medical University-Shuang Ho Hospital, New Taipei City 23561, Taiwan
9. Department of Medical Laboratory Science and Biotechnology, Yuanpei University of Medical Technology, Hsinchu 300, Taiwan

† Contributed equally to this work

\*Corresponding author

Dr. Chien-Min Lin, Division of Neurosurgery, Department of Surgery, Taipei Medical University-Shuang Ho Hospital, New Taipei City 23561, Taiwan. E-mail: [m513092004@tmu.edu.tw](mailto:m513092004@tmu.edu.tw)

**Supplementary Table S1.**

| No. | Target         | Dilution |            | Source        |
|-----|----------------|----------|------------|---------------|
| 1   | MRP1           | 1:200    | ab24102    | Abcam         |
| 2   | Sox2           | 1:1000   | ab137385   | Abcam         |
| 3   | MGMT           | 1:1000   | #2739      | cellsignaling |
| 4   | MLH1           | 1:1000   | #3515      | cellsignaling |
| 5   | MSH2           | 1:1000   | #2017      | cellsignaling |
| 6   | MSH6           | 1:1000   | #5424      | cellsignaling |
| 7   | N-Cadherin     | 1:1000   | #13116     | cellsignaling |
| 8   | Vimentin       | 1:1000   | #5741      | cellsignaling |
| 9   | Slug           | 1:1000   | #9585      | cellsignaling |
| 10  | Oct-4A         | 1:1000   | #2890      | cellsignaling |
| 11  | KLF4           | 1:1000   | #12173     | cellsignaling |
| 12  | Mut-P53        | 1:50     | PAb240     | Merck         |
| 13  | $\beta$ -actin | 1:10000  | 66009-1-Ig | PROTEINTECH   |
| 14  | BCRP1          | 1:1000   | sc-58222   | Santa Cruz    |
| 15  | MDR1           | 1:1000   | sc-55510   | Santa Cruz    |
| 16  | PMS2           | 1:1000   | sc-25315   | Santa Cruz    |
| 17  | Ki-67          | 1:100    | 790-4286   | Ventana       |

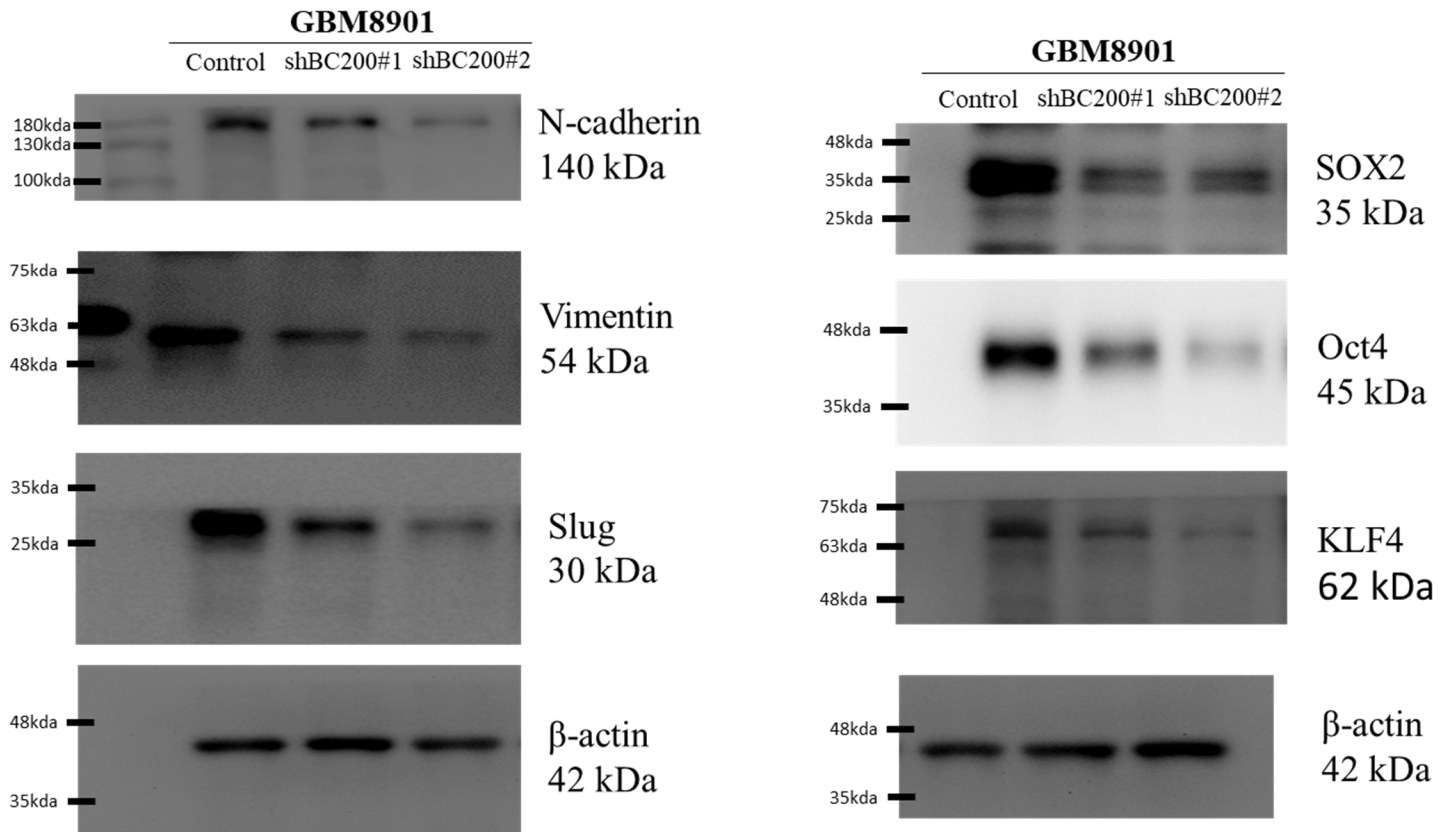

**Supplementary Figure S1.** Full-size blots of Figure 3D and 3H

**U87MG**

Control OEBC200#1 OEBC200#2

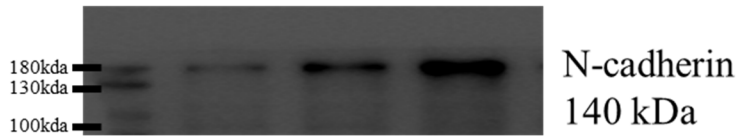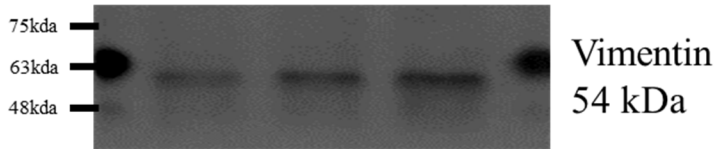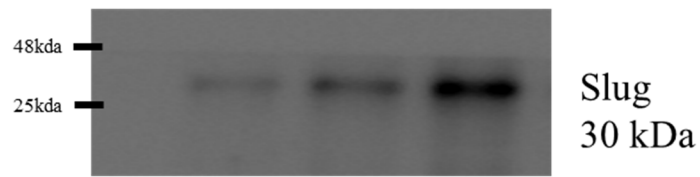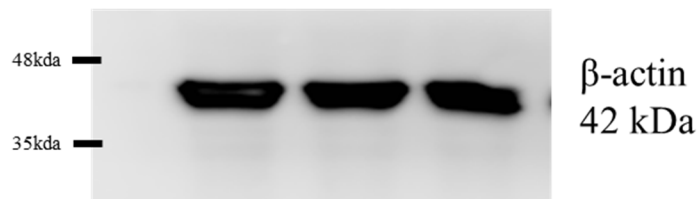

**U87MG**

Control OEBC200#1 OEBC200#2

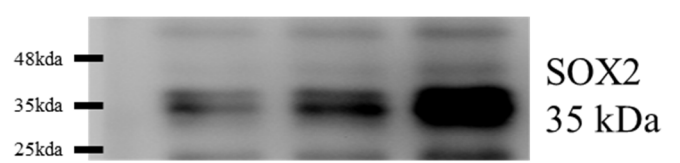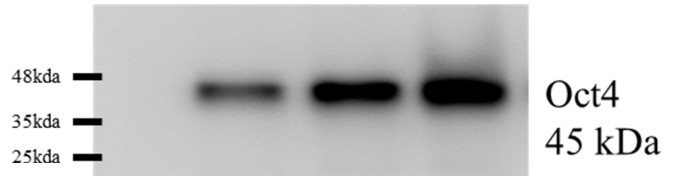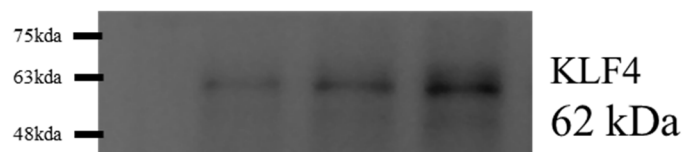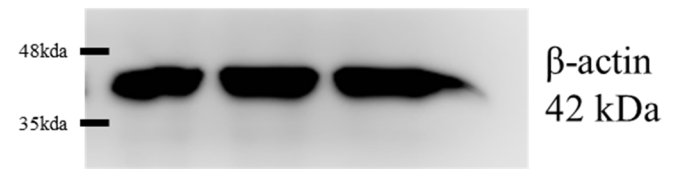

**Supplementary Figure S2.** Full-size blots of Figure 4D and 4H

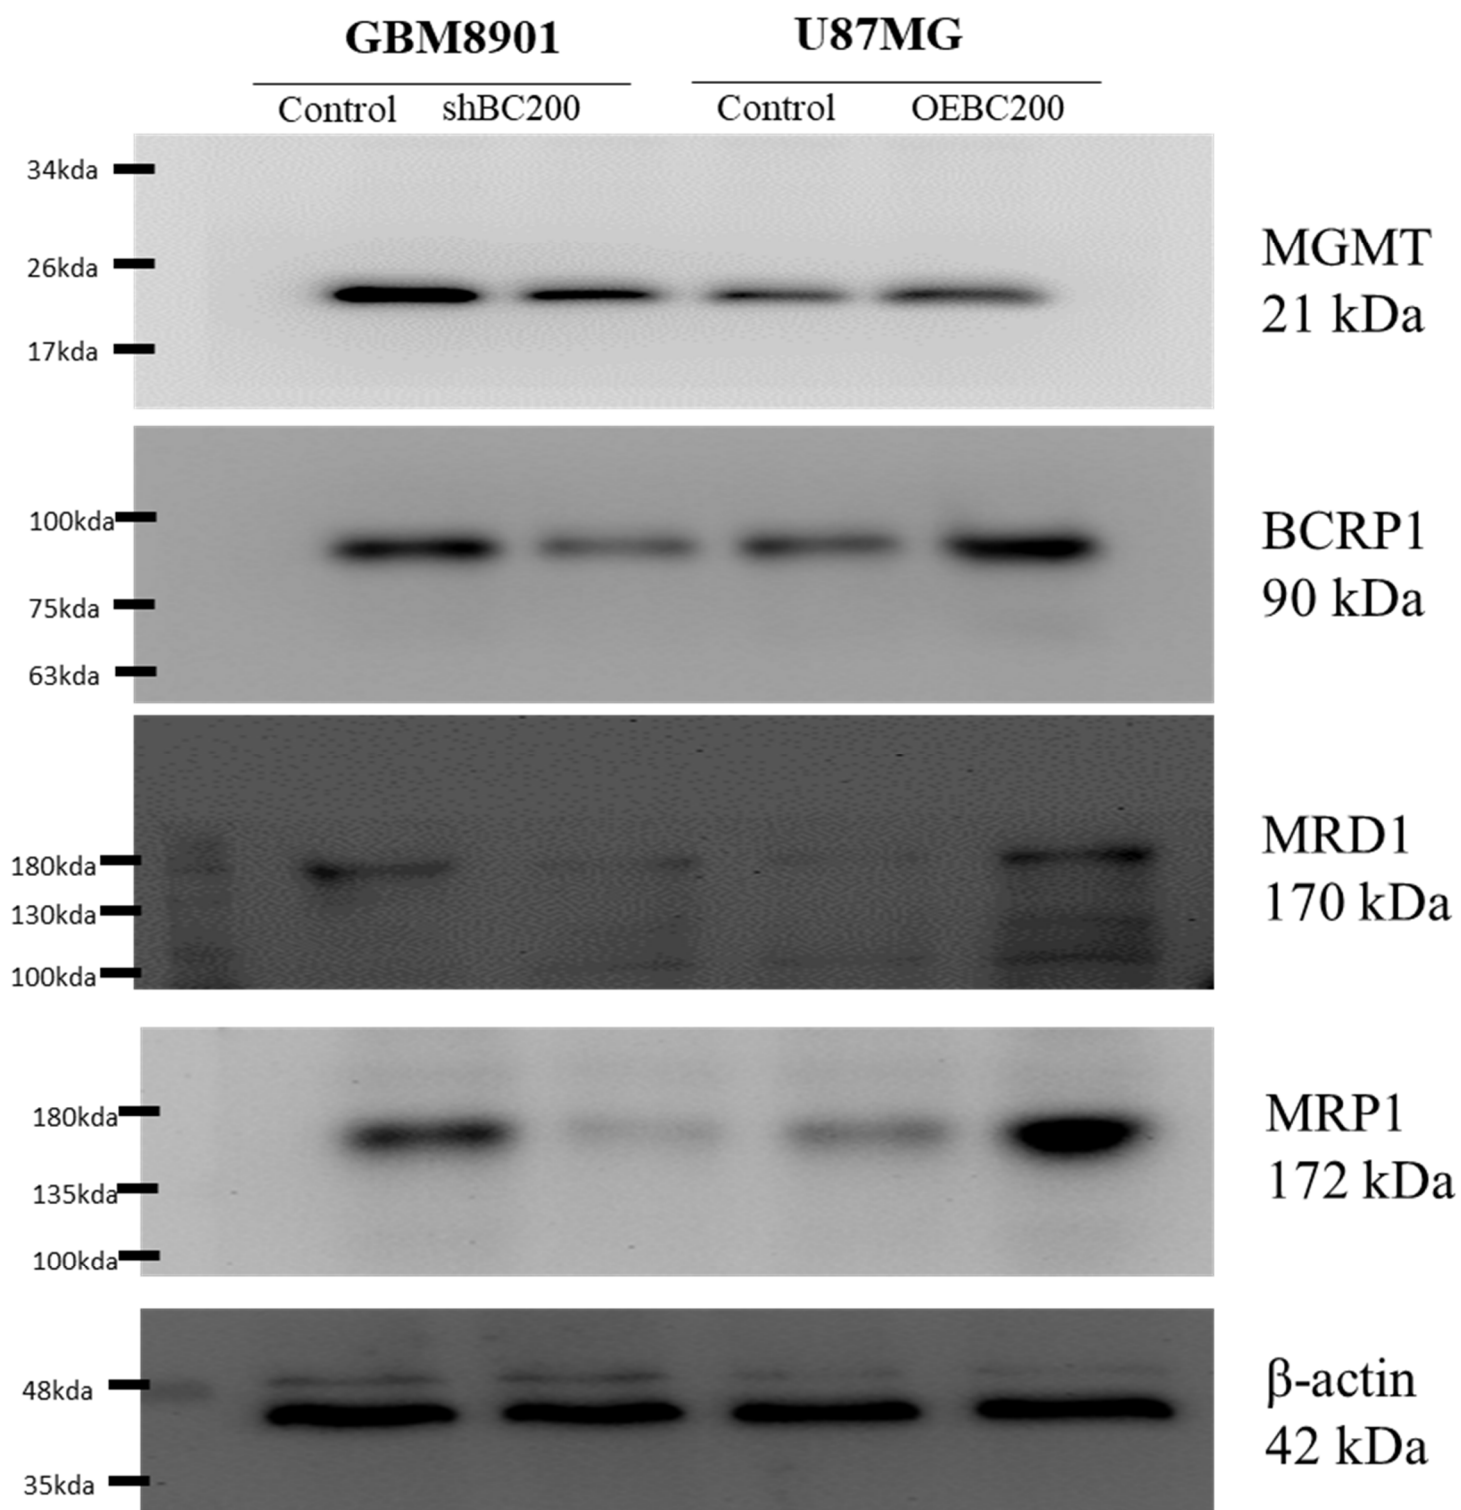

**Supplementary Figure S3.** Full-size blots of Figure 5B

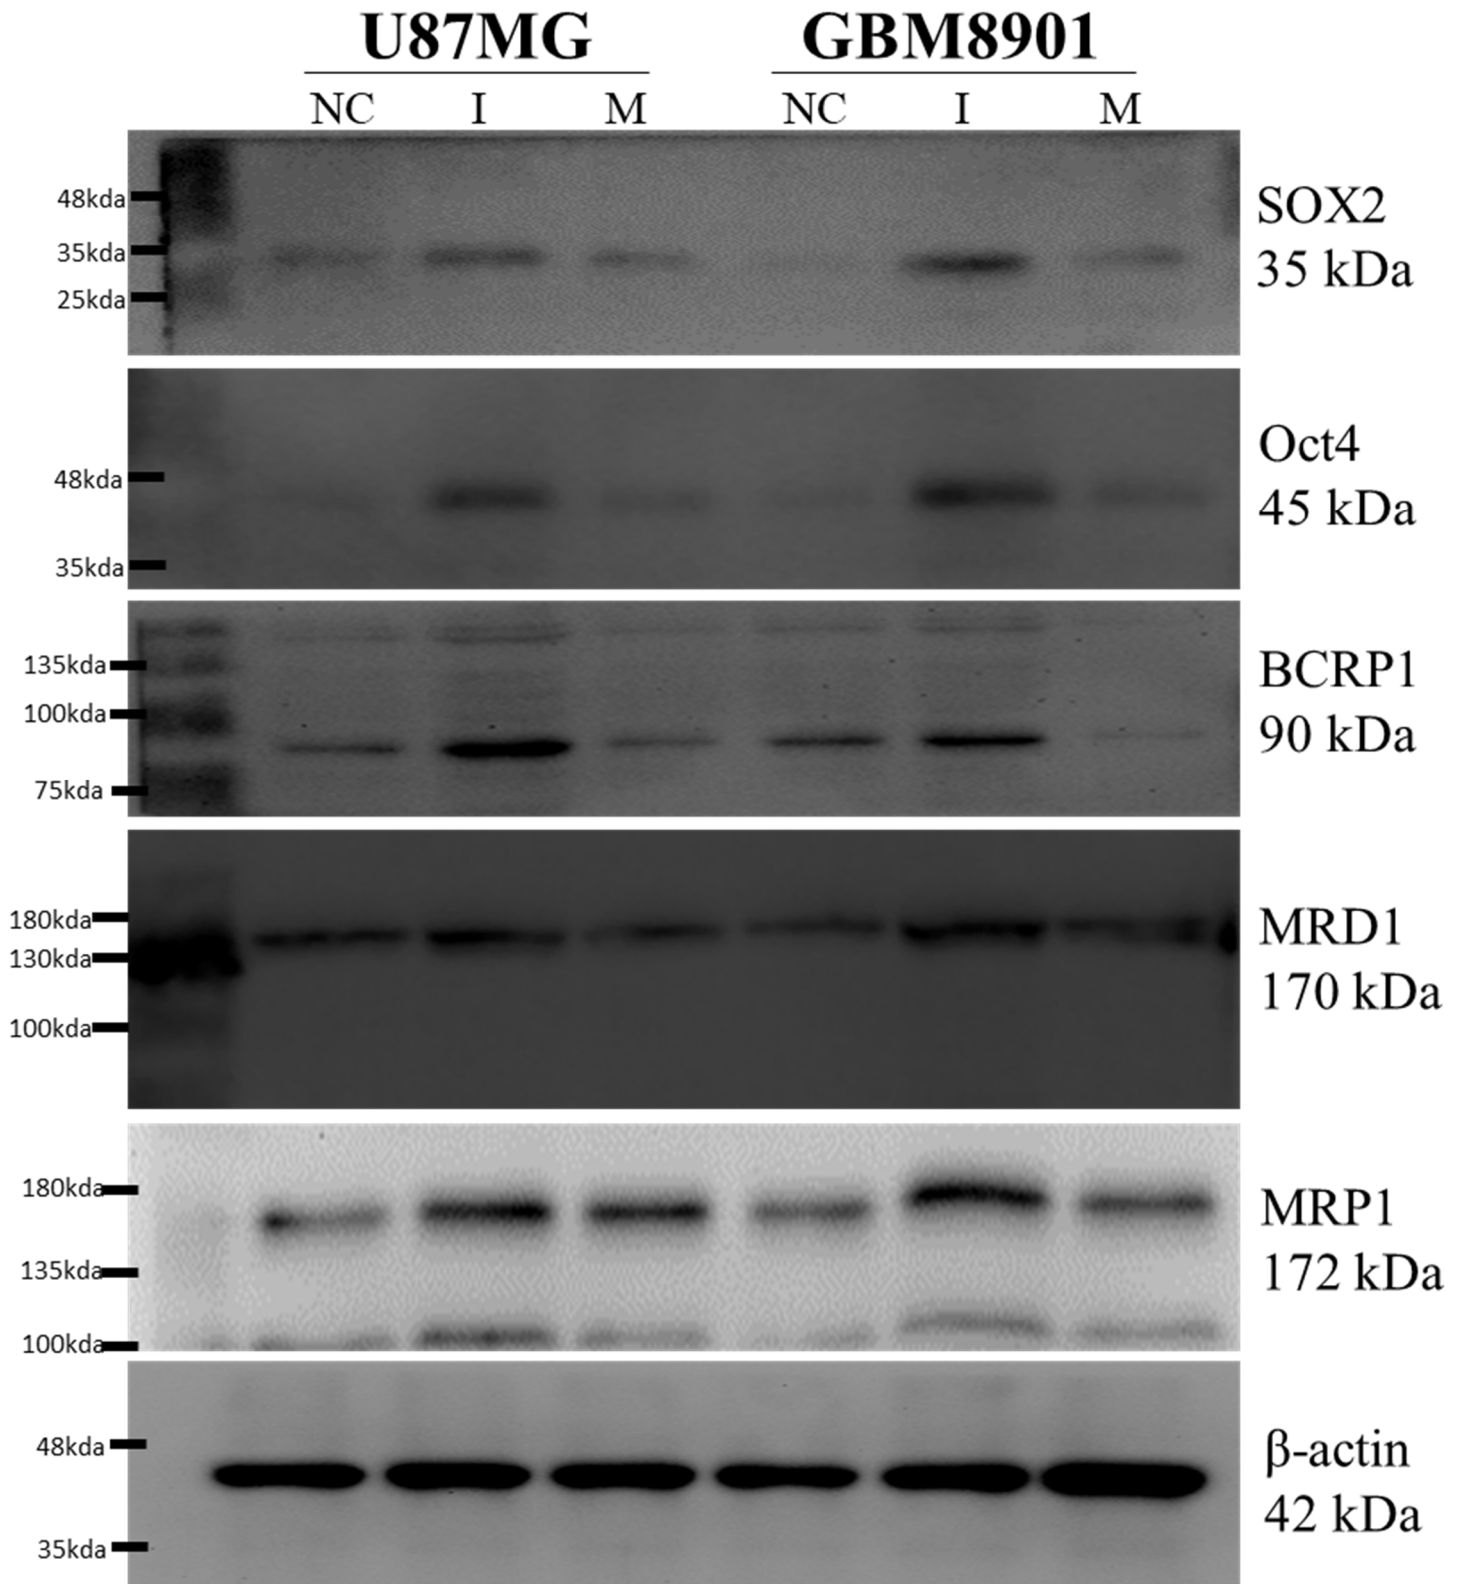

**Supplementary Figure S4.** Full-size blots of Figure 6G

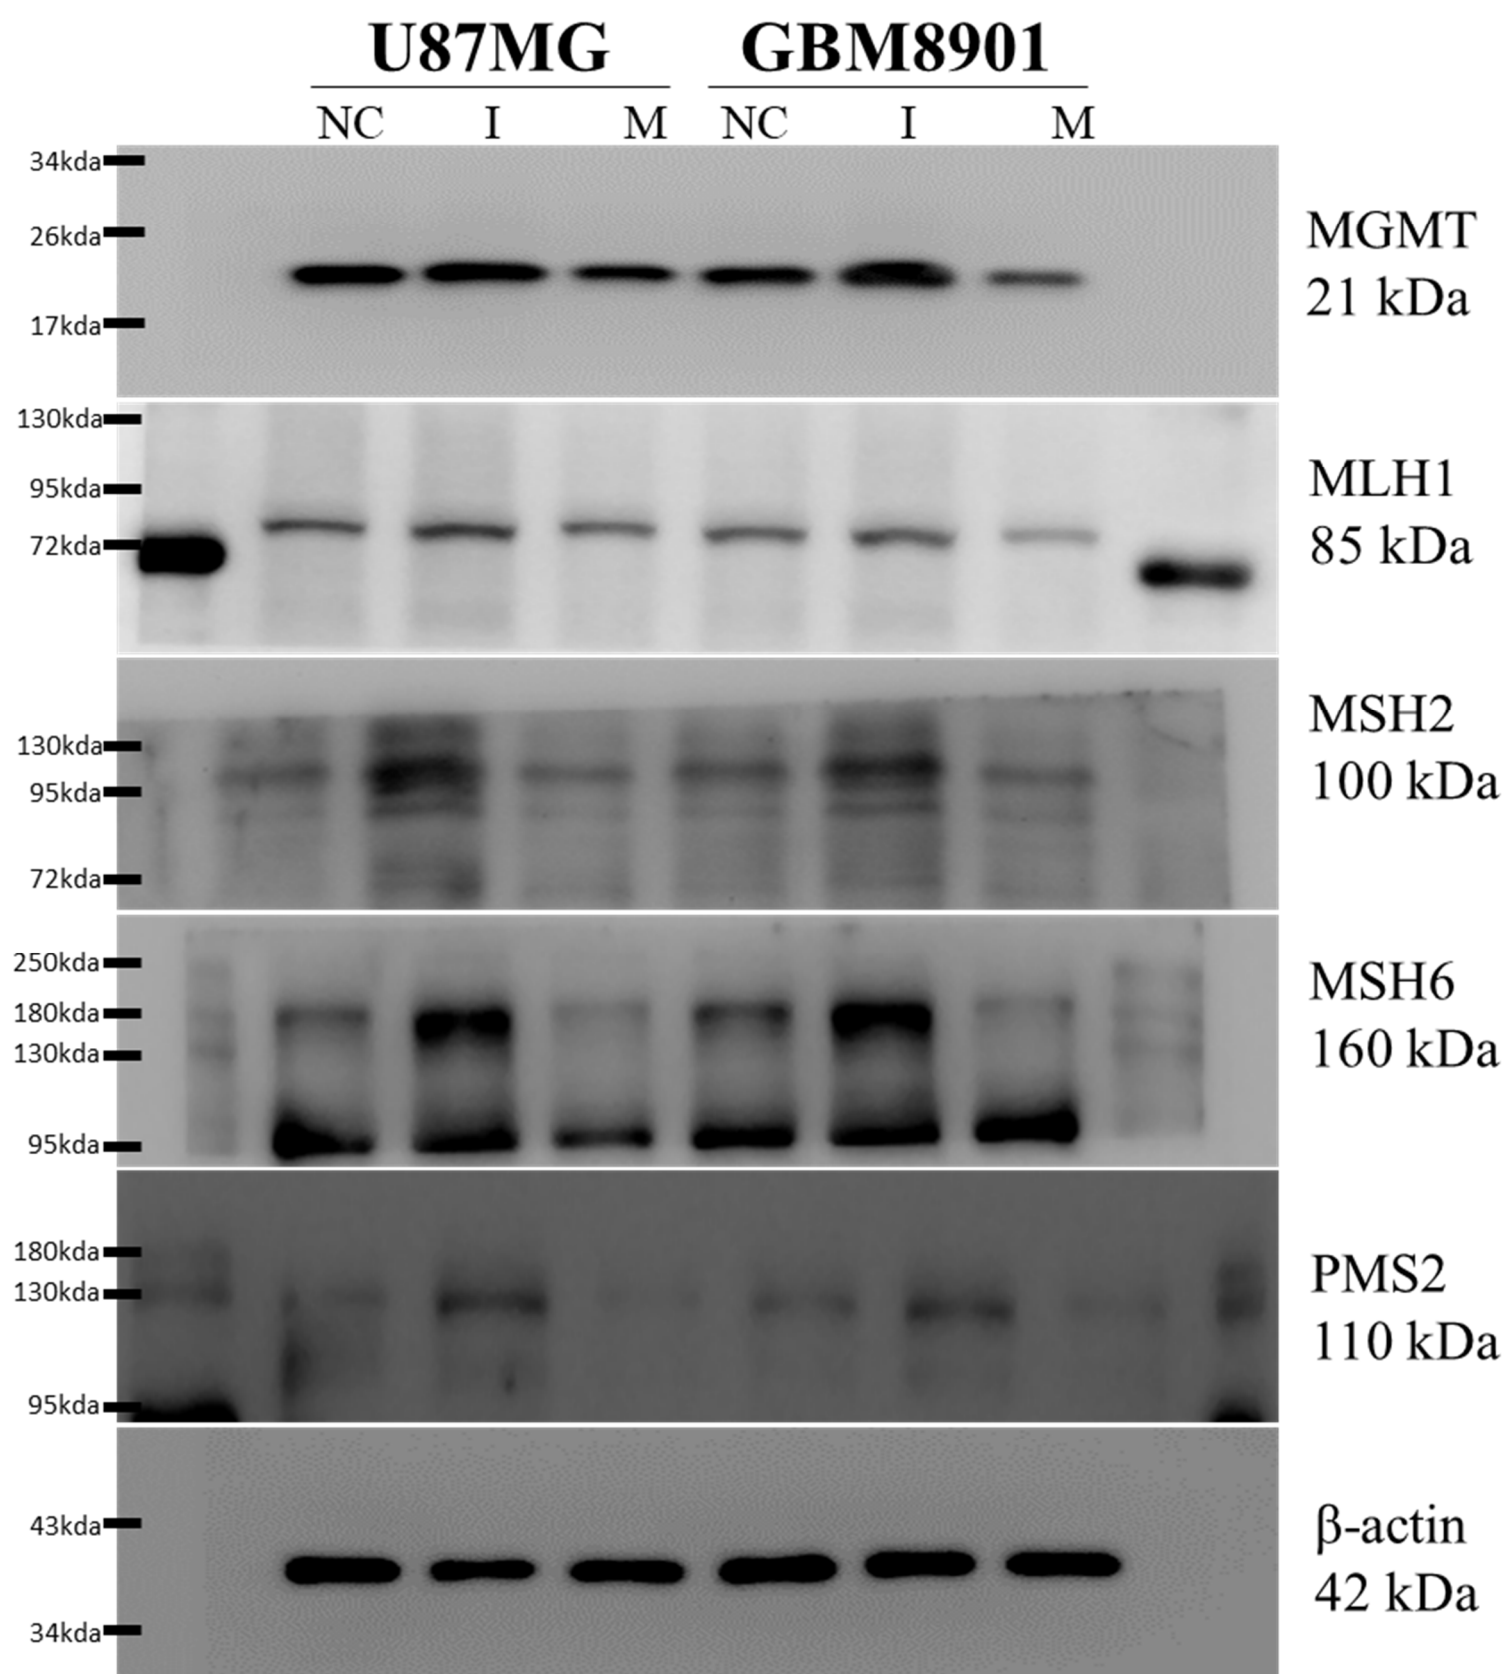

**Supplementary Figure S5.** Full-size blots of Figure 6H
